# Supplementary material
Source: MDPI journal article supplement (https://www.mdpi.com/2073-4352/12/2/139)
Supplement: s1 [file s1]

## Supplementary materials

# Varying Synthesis Conditions and Comprehensive Characterization of Fluorine-Doped Hydroxyapatite Nanocrystals in a Simulated Body Fluid

Dinbandhu Thakur <sup>1,†</sup>, Sheng-Chi Yeh <sup>1,†</sup>, Ren-Hao Cheng <sup>1</sup>, Song-Seng Loke <sup>2,\*</sup>, Hung-Hsiang Wei <sup>1</sup>, Po-Yu Cheng <sup>1</sup>, Yi-Chun Lai <sup>1</sup>, Hsuan-Ying Chen <sup>3</sup>, Yu-Ren Huang <sup>4</sup> and Shang-Wu Ding <sup>1,\*</sup>

<sup>1</sup> Department of Chemistry and Center for Nanoscience and Nanotechnology, National Sun Yat-Sen University, Kaohsiung 80424, Taiwan; d062020006@student.nsysu.edu.tw (D.T.); shengchi.yeh@g-mail.nsysu.edu.tw (S.-C.Y.); d012020004@student.nsysu.edu.tw (R.-H.C.); paul88881@g-mail.nsysu.edu.tw (H.-H.W.); b025090035@student.nsysu.edu.tw (P.-Y.C.); i200194646@outlook.com (Y.-C.L.)

<sup>2</sup>

<sup>2</sup> Department of Family Medicine, Kaohsiung Chang Gung Memorial Hospital and Chang Gung University College of Medicine, 123, Dapi Road, Niasong District, Kaohsiung 833, Taiwan

<sup>3</sup> Department of Medicinal and Applied Chemistry, Kaohsiung Medical University, 100, Shih-Chuan 1st Road, Kaohsiung 80708, Taiwan; hchen@kmu.edu.tw

<sup>4</sup> Department of Applied Science, R.O.C. Naval Academy, No. 669, Junxiao Road, Zuoying District, Kaohsiung 813, Taiwan; g971101@yahoo.com.tw

\* Correspondence: loke@cgmh.org.tw (S.S.L.); ding@mail.nsysu.edu.tw (S.D.); Tel.: +886-7525-3917 (S.D.)

† These authors contributed equally to this work.

**Citation:** Thakur, D.; Yeh, S.-C.; Cheng, R.-H.; Loke, S. S.; Wei, H.-H.; Cheng, P.-Y.; Lai, Y.-C.; Chen, H.-Y.; Huang, Y.-R.; Ding, S. Varying Synthesis Conditions and Comprehensive Characterization of Fluorine-Doped Hydroxyapatite Nanocrystals in a Simulated Body Fluid. *Crystals* **2022**, *12*, 139. <https://doi.org/10.3390/cryst12020139>

Academic Editor: Dr. Roberto Comparelli

Received: 3 January 2022

Accepted: 17 January 2022

Published: 20 January 2022

**Publisher's Note:** MDPI stays neutral with regard to jurisdictional claims in published maps and institutional affiliations.

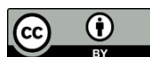

**Copyright:** © 2022 by the authors. Licensee MDPI, Basel, Switzerland. This article is an open access article distributed under the terms and conditions of the Creative Commons Attribution (CC BY) license (<https://creativecommons.org/licenses/by/4.0/>).

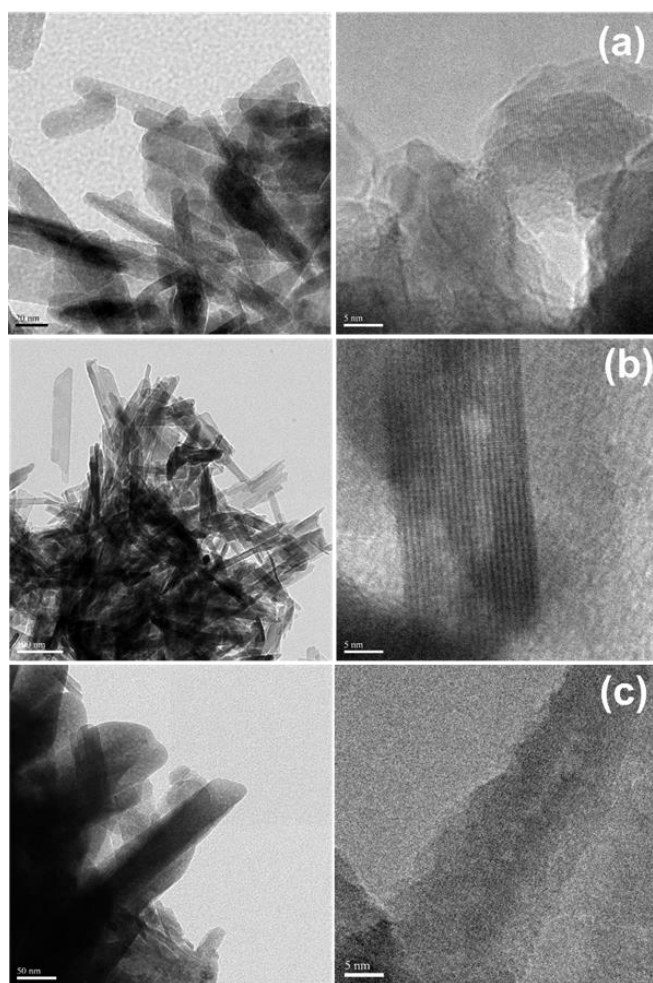

**Figure S1.** HRTEM images of HAp synthesized in SBF at different pH values pH=7.0 (a); pH=7.2 (b) and pH=7.4 (c).

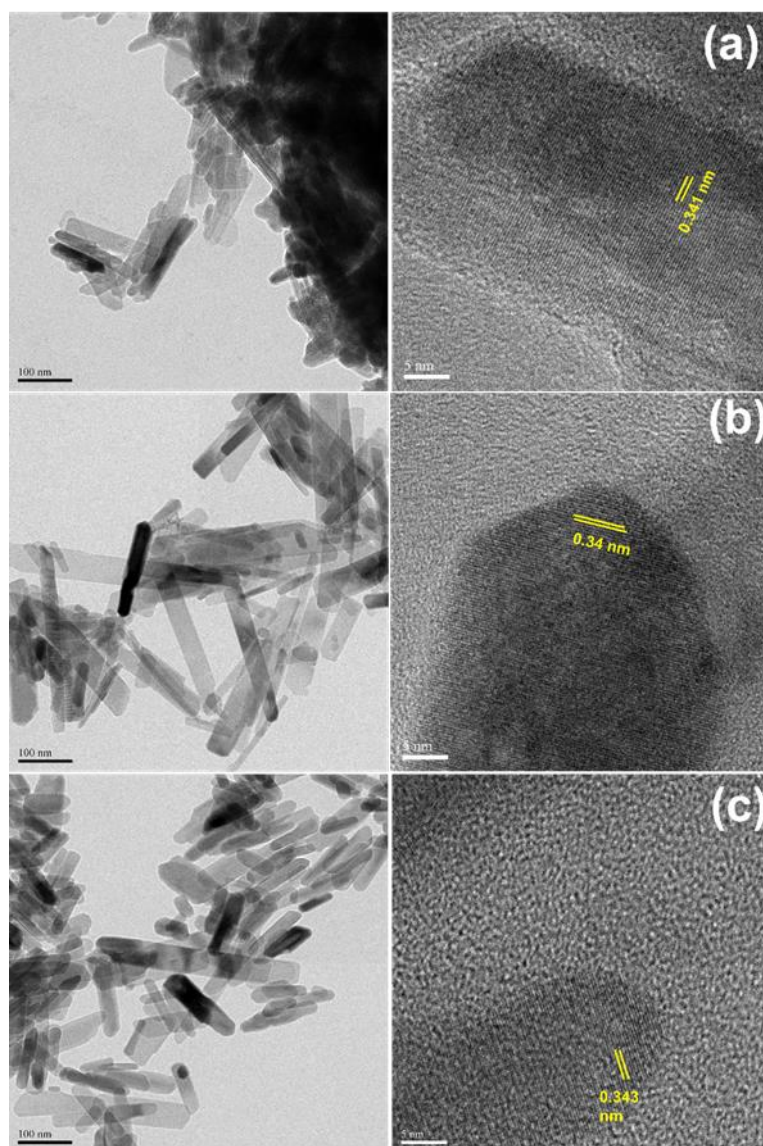

**Figure S2.** HRTEM images of HAp synthesized in SBF followed by soaking in NaF solution at 0.0025 M for 1 day (a); 3 days (b) and 7 days (c).

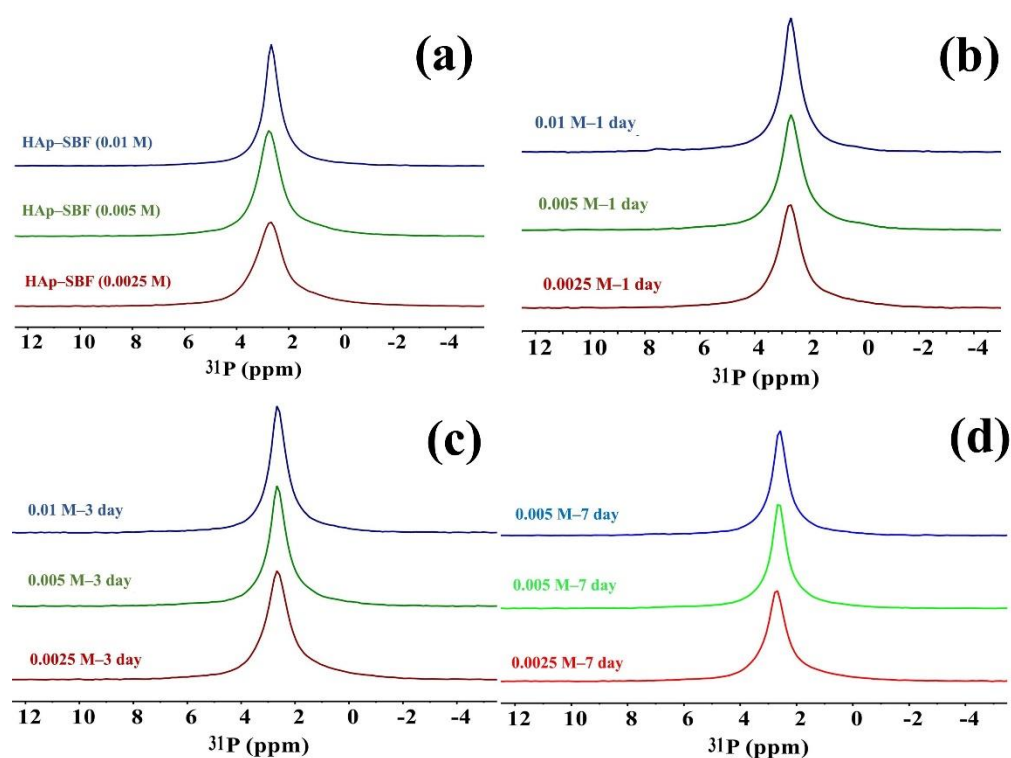

**Figure S3.** (a):  $^{31}\text{P}$  35 kHz MAS NMR spectra of HAp synthesized in different NaF concentrations; (b):  $^{31}\text{P}$  35 kHz MAS NMR spectra of HAp synthesized in BSF and soaked in NaF solutions at different concentrations for 1 days; (c):  $^{31}\text{P}$  35 kHz MAS NMR spectra of HAp synthesized in BSF and soaked in NaF solutions at different concentrations for 3 days; (d):  $^{31}\text{P}$  35 kHz MAS NMR spectra of HAp synthesized in BSF and soaked in NaF solutions at different concentrations for 7 days.

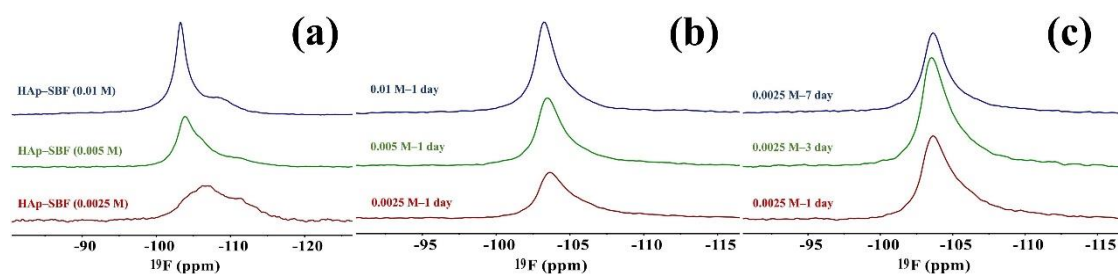

**Figure S4.** (a):  $^{19}\text{F}$  35 kHz MAS NMR spectra of HAp synthesized in SBF solutions with different concentrations of F<sup>-</sup> ion; (b):  $^{19}\text{F}$  35 kHz MAS NMR spectra of HAp soaked for 1 day in solutions with different concentrations of F<sup>-</sup> ion; (c):  $^{19}\text{F}$  35 kHz MAS NMR spectra of HAp soaked for different days in solutions with the same concentration of F<sup>-</sup> ion (2.5 mM).

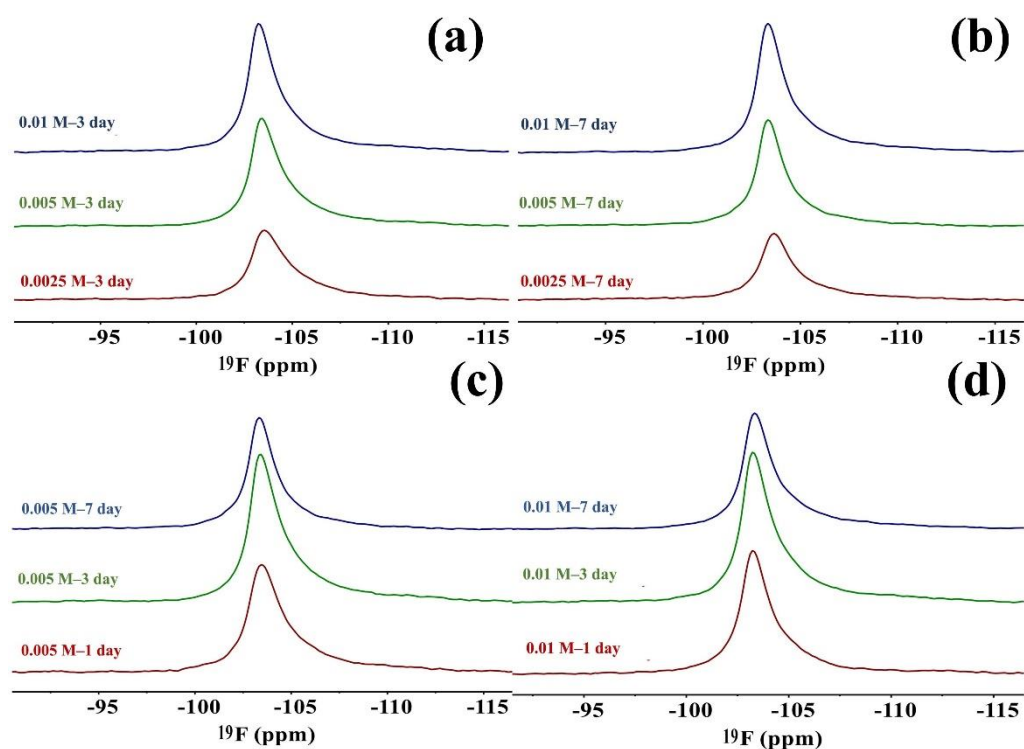

**Figure S5.** (a):  $^{19}\text{F}$  35 kHz MAS NMR spectra of HAp soaked for 3 days in solutions with different concentrations of  $\text{F}^-$  ion; (b):  $^{19}\text{F}$  35 kHz MAS NMR spectra of HAp soaked for 7 days in solutions with different concentrations of  $\text{F}^-$  ion; (c):  $^{19}\text{F}$  35 kHz MAS NMR spectra of HAp soaked for different days in solutions with the same concentration of  $\text{F}^-$  ion (5 mM); (d):  $^{19}\text{F}$  35 kHz MAS NMR spectra of HAp soaked for different days in solutions with the same concentration of  $\text{F}^-$  ion (10 mM).

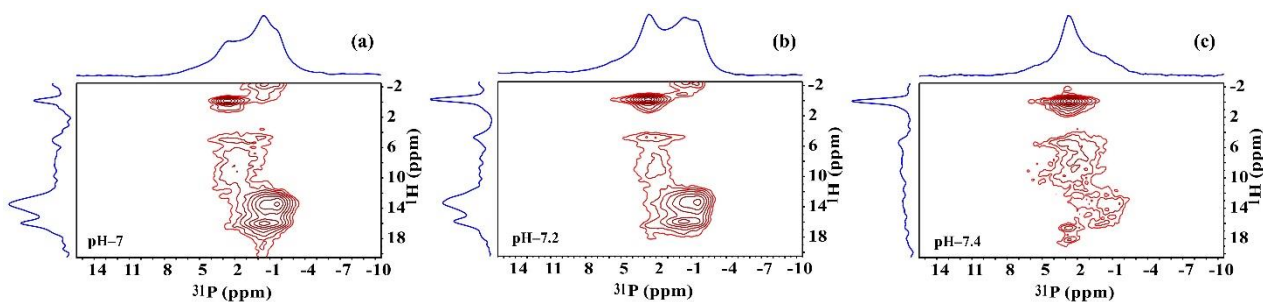

**Figure S6.**  $^1\text{H}$ - $^{31}\text{P}$  35 kHz HETCOR spectra of HAp synthesized in SBF at different pH values: pH=7 (a); pH=7.2 (b) and pH=7.4 (c).

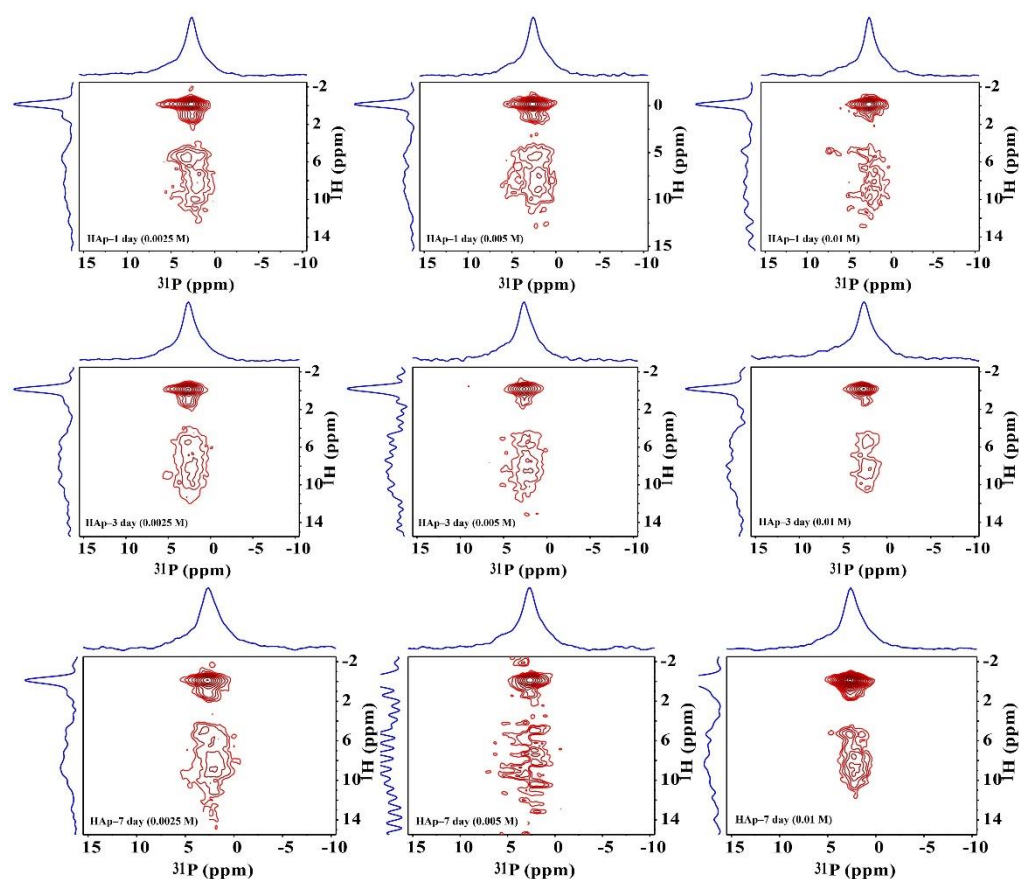

**Figure S7.**  $^1\text{H}$ - $^{31}\text{P}$  35 kHz HETCOR spectra of HAp synthesized in SBF and soaked in solutions at different NaF concentrations (2.5 mM, 5 mM and 10 mM) for different days (1 day, 3 days, 7 days), respectively.
